# Supplementary material for: Enhanced Insecticidal Effect and Interface Behavior of Nicotine Hydrochloride Solution by a Vesicle Surfactant
Source: MDPI journal article supplement (doi:10.3390/molecules27206916), 2022-10-15
Supplement: s1 [file s1]

## Supporting Information

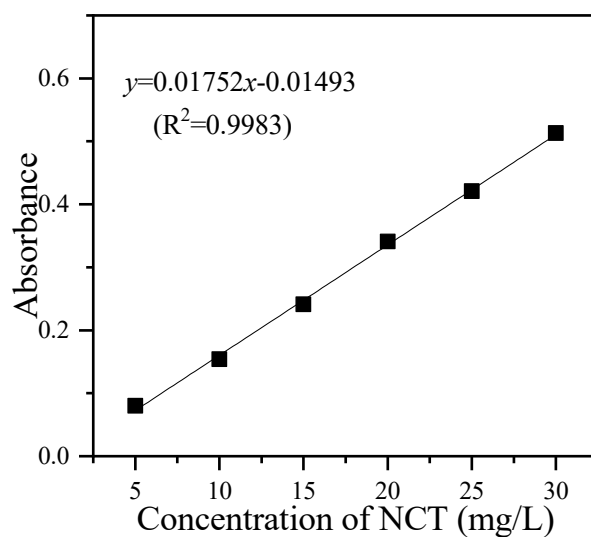

**Figure S1.** Standard curve of NCT/water solution.

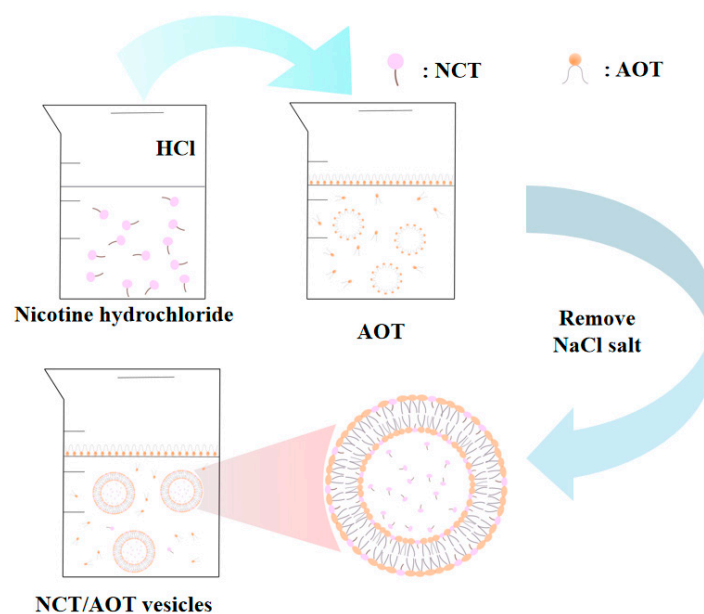

**Scheme S1.** The preparation process of NCT/AOT vesicles.

**Table S1.** Toxicity of NCT/AOT to Aphids.

| Sample  | <sup>a</sup> LC <sub>50</sub> /ppm | Regression Equation | Correlation Coefficient |
|---------|------------------------------------|---------------------|-------------------------|
| NCT     | 91.68                              | Y=0.478X+4.063      | 0.99                    |
| AOT     | 99.03                              | Y=4.271X-3.524      | 0.94                    |
| NCT/AOT | 10.55                              | Y=2.370X+2.575      | 0.99                    |

<sup>a</sup>Lethal concentration that cause 50% mortality.

**Table S2.** pH of NCT/AOT at different molar ratio of NCT and (AOT+NCT).

| <b>Molar Ratio</b> | 1/10 | 2/10 | 3/10 | 4/10 | 5/10 | 6/10 | 7/10 | 8/10 | 9/10 |
|--------------------|------|------|------|------|------|------|------|------|------|
| <b>pH</b>          | 2.23 | 1.73 | 1.46 | 1.31 | 1.29 | 1.12 | 1.04 | 0.98 | 0.92 |

**Table S3.** Particle size, PDI and Zeta potential of NCT/AOT at different dilution ratio.

| <b>Dilution Ratio</b>      | 0         | 200       | 500       | 1000       | 2000      |
|----------------------------|-----------|-----------|-----------|------------|-----------|
| <b>Particle size (nm)</b>  | 198±2     | 187±2     | 186±3     | 178±1      | 159±1     |
| <b>PDI</b>                 | 0.23      | 0.21      | 0.23      | 0.15       | 0.10      |
| <b>Zeta potential (mV)</b> | -56.5±1.1 | -54.8±2.2 | -43.6±0.3 | -39. 0±0.8 | -32.8±2.0 |
